# Supplementary material for: A cross-correlation-based method for determining size-resolved particle growth rates
Source: Copernicus journal article supplement (doi:10.5194/ar-3-637-2025), 2025-12-17
Supplement: Supplementary file 1 [file supplementary_material_figures.pdf › supplement/supplementary_material_figures.pdf]

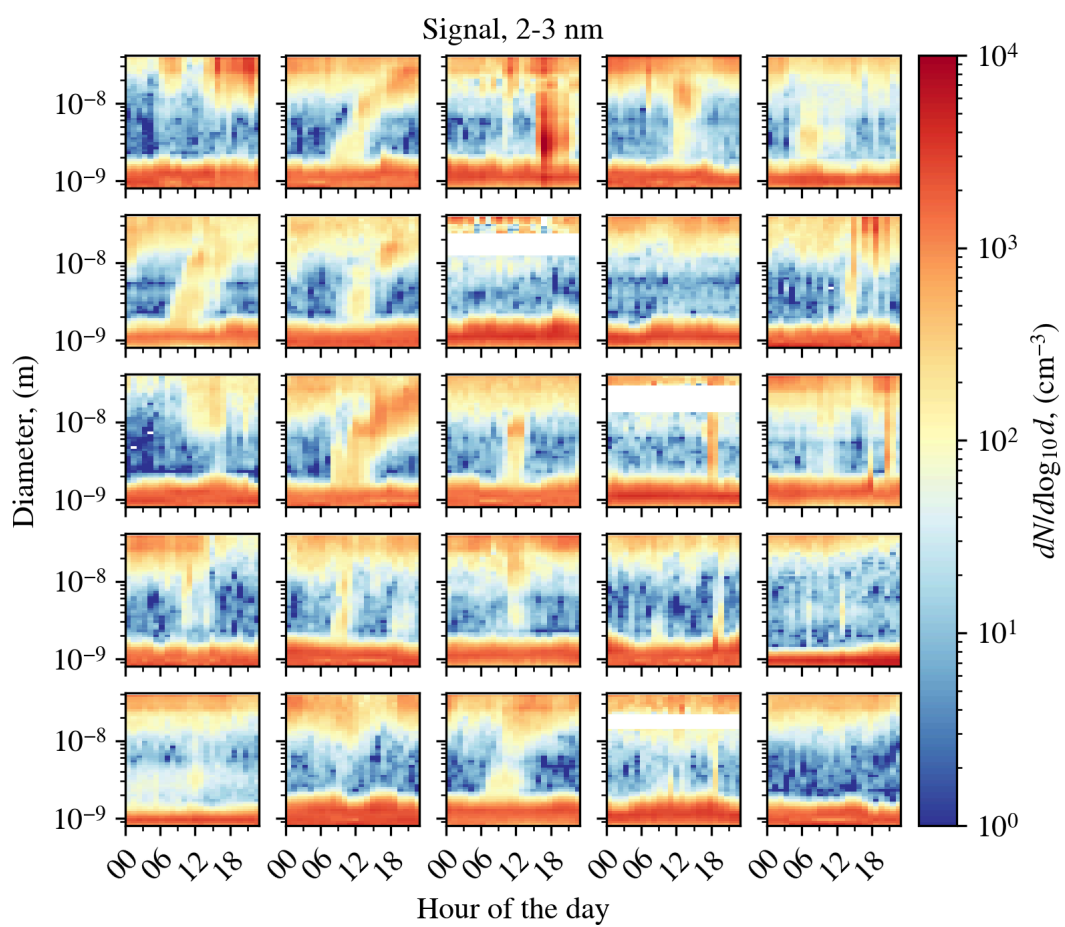

**Figure S1:** Example negative ion number size distributions on days sampled from the  $GR_{2-3}^-$  distribution's signal part.

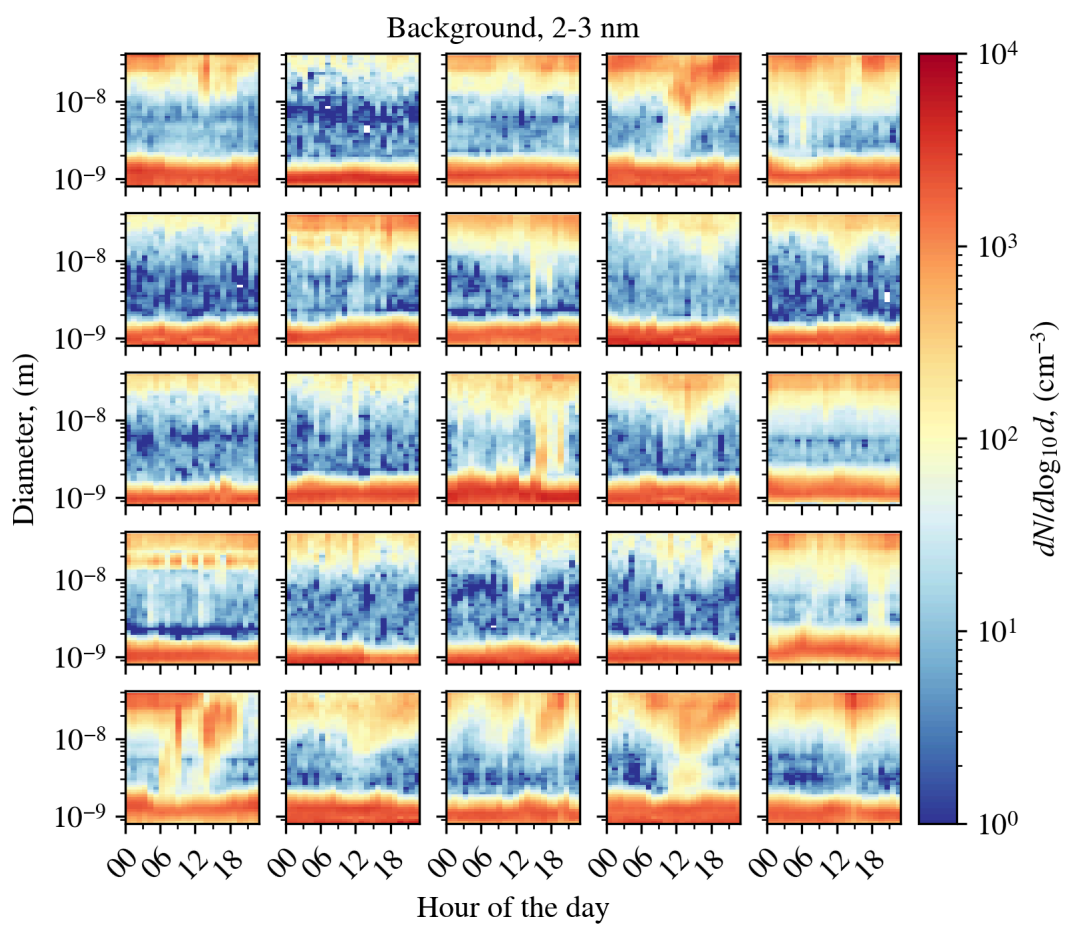

**Figure S2:** Example negative ion number size distributions on days sampled from the  $GR_{2-3}^-$  distribution's background part.

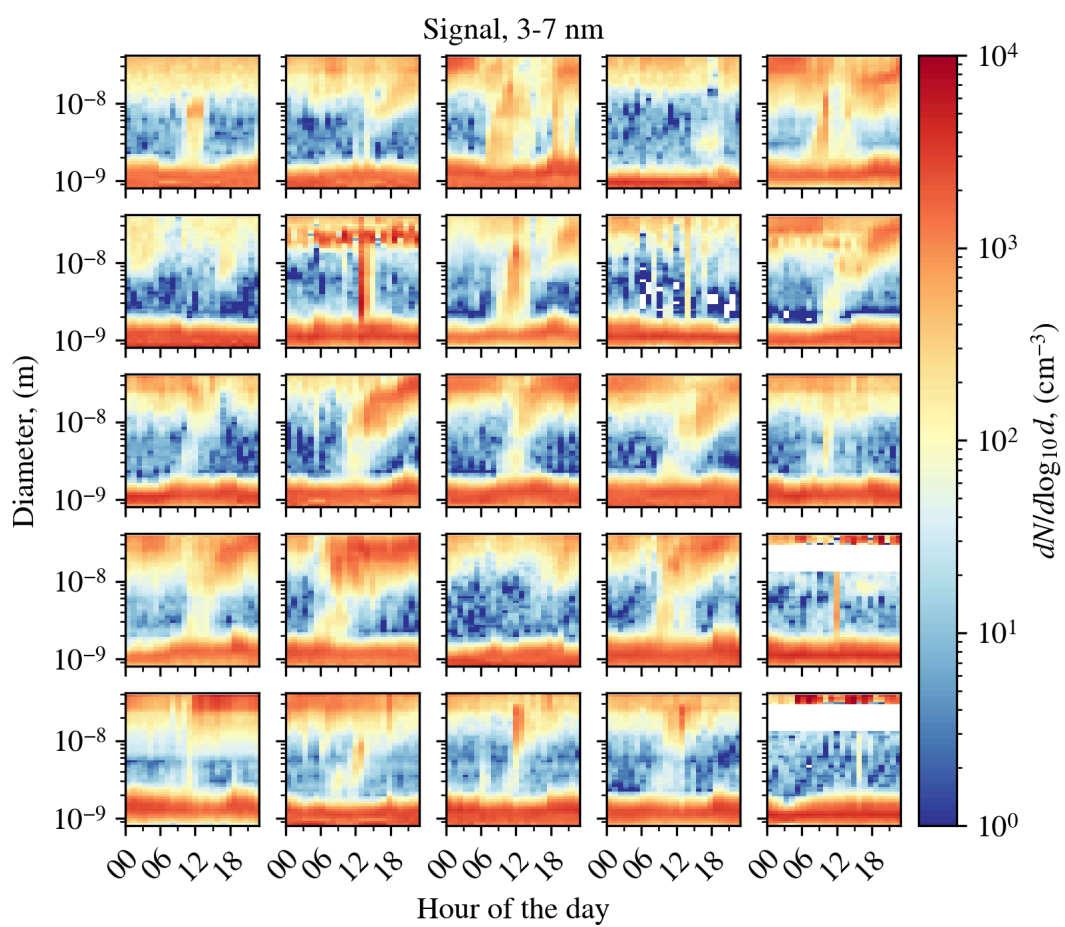

**Figure S3: Example negative ion number size distributions on days sampled from the  $GR_{3-7}^-$  distribution's signal part.**

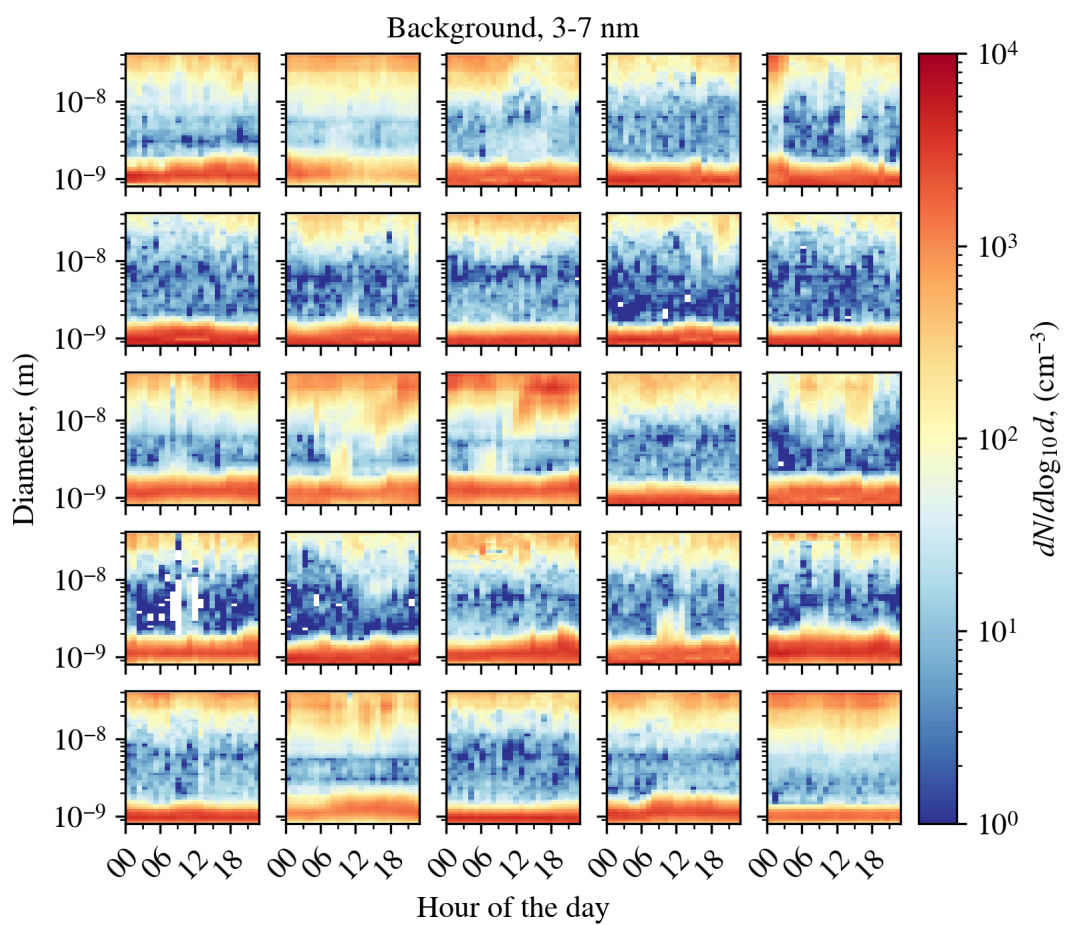

**Figure S4: Example negative ion number size distributions on days sampled from the  $GR_{3-7}^-$  distribution's background part.**
