# Supplementary material for: A cross-correlation-based method for determining size-resolved particle growth rates
Source: Copernicus journal article supplement (doi:10.5194/ar-3-637-2025), 2025-12-17
Supplement: Supplementary file [file ar-3-637-2025-supplement-title-page.pdf › ar-3-637-2025-supplement-title-page.pdf]

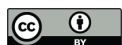

## *Supplement of*

# **A cross-correlation-based method for determining size-resolved particle growth rates**

**Janne Lampilahti et al.**

*Correspondence to:* Janne Lampilahti ([janne.lampilahti@helsinki.fi](mailto:janne.lampilahti@helsinki.fi))

- [ar-3-637-2025-supplement-title-page.pdf](#)
- [supplement](#)
  - [ARCA\\_box\\_model\\_configuration.txt](#)
  - [supplementary\\_material\\_figures.pdf](#)

The copyright of individual parts of the supplement might differ from the article licence.
